# Supplementary material
Source: publisher site journal article supplement (https://www.dovepress.com/article/487872)
Supplement: Supplementary file 1 [file get_supplementary_file.php]

| **Table S1. Linear mixed-effects model for HR** | | | | |
| --- | --- | --- | --- | --- |
| Source | Numerator df | Denominator df | F | p |
| Intercept | 1 | 81.000 | 8394.119 | .000 |
| Group | 1 | 81.000 | 42.653 | .000 |
| Time point | 4 | 324.000 | 20.306 | .000 |
| Group * Time point | 4 | 324.000 | 14.664 | .000 |
| Notes: HR, Heart Rate. | | | | |

| **Table S2. Linear mixed-effects model for MAP** | | | | |
| --- | --- | --- | --- | --- |
| Source | Numerator df | Denominator df | F | p |
| Intercept | 1 | 81.000 | 9017.990 | .000 |
| Group | 1 | 81.000 | 40.738 | .000 |
| Time point | 4 | 324.000 | 28.659 | .000 |
| Group * Time point | 4 | 324.000 | 11.225 | .000 |
| Notes: MAP, Mean Arterial Pressure. | | | | |
